# Supplementary material for: The Prevalence of Adverse Drug Reactions and Adverse Drug Events from Heart Failure Medications in Frail Older Adults: A Systematic Review
Source: PubMed Central journal article supplement — Drugs Aging. 2022 Jun 28;39(8):631–43. doi: 10.1007/s40266-022-00957-8 (PMC9355931; doi:10.1007/s40266-022-00957-8), 2022-06-28
Supplement: 40266_2022_957_MOESM1_ESM.pdf [file 40266_2022_957_MOESM1_ESM.pdf]

## Supplementary Information

### *Drugs and Aging*

# The Prevalence of Adverse Drug Reactions and Adverse Drug Events from Heart Failure Medications in Frail Older Adults: A Systematic Review

Mai H Duong\*, Danijela Gnjidic, Andrew J McLachlan, Marissa A Sakiris, Parag Goyal, Sarah N Hilmer.

Corresponding author: Mai H. Duong, E-mail: [mai.duong@sydney.edu.au](mailto:mai.duong@sydney.edu.au)

**Table S1.** Search strategy

**Table S2.** PRESS validation checklist

**Table S3.** Eligible guideline directed heart failure specific medications in search strategy

**Figure S1.** Risk of bias assessment: ROBINS-I summary for non-randomised intervention studies

**Table S4.** GRADE criteria and scoring

Table S4a: GRADE Assessment Criteria

Table S4b: Definition of grades of evidence

Table S4c: GRADE Scoring

**Table S5.** Subgroup of included participants from a secondary analysis of two randomised controlled trials.

**Table S1 Search strategy**

| <b>ADRs or ADEs; AND</b>                                                                                                                                                                                                                                                                                                                                                                                                                                                                                                                                                         | <b>Heart Failure;<br/>AND</b>                                                                                                    | <b>Elderly;<br/>AND</b>                                                 | <b>Frailty</b>                           |
|----------------------------------------------------------------------------------------------------------------------------------------------------------------------------------------------------------------------------------------------------------------------------------------------------------------------------------------------------------------------------------------------------------------------------------------------------------------------------------------------------------------------------------------------------------------------------------|----------------------------------------------------------------------------------------------------------------------------------|-------------------------------------------------------------------------|------------------------------------------|
| adverse drug reaction* OR adverse drug event* OR adverse effect*<br>OR adrs OR adverse drug effect* OR adverse reaction* OR adverse<br>event* OR adverse outcome* OR complication* OR harm* OR side<br>effect* OR undesirable effect* OR treatment emergent OR<br>tolerability OR toxicity OR safe OR safety OR adverse drug reaction<br>reporting systems OR drug hypersensitivity OR drug monitoring<br>OR drug toxicity OR adverse outcome OR undesirable event* OR<br>unexpected effect* OR unexpected event* OR abnormalities, drug<br>induced OR long term adverse effects | heart failure OR<br>cardiac failure OR<br>congestive heart<br>failure OR heart<br>decompensation<br>OR cardiac<br>decompensation | Aged OR<br>elderly OR<br>Aging OR<br>older adult*<br>OR older<br>people | Frailty OR<br>Frail Elderly<br>OR frail* |

**Table S2 PRESS validation checklist**

**TABLE 10: PRESS GUIDELINE ASSESSMENT FORM**  
**PRESS Guideline — Search Submission & Peer Review Assessment**

**SEARCH SUBMISSION:**

Searcher: Mai Duong

[Email: mai.duong@sydney.edu.au](mailto:mai.duong@sydney.edu.au)

**Date submitted:** Wednesday May 12, 2021

**Date requested by:** Friday May 14,

**2021 Systematic Review Title:**

The prevalence of adverse drug reactions or adverse drug events with heart failure management in frail older adults: a systematic review and meta-analysis.

**This search strategy is...**

|   |                                                                                                                                                                                                                   |
|---|-------------------------------------------------------------------------------------------------------------------------------------------------------------------------------------------------------------------|
| X | My PRIMARY (core) database strategy — First time submitting a strategy for search question and database                                                                                                           |
|   | My PRIMARY (core) strategy — Follow-up review NOT the first time submitting a strategy for search question and database. If this is a response to peer review, itemize the changes made to the review suggestions |
|   | SECONDARY search strategy— First time submitting a strategy for search question and database                                                                                                                      |
|   | SECONDARY search strategy — NOT the first time submitting a strategy for search question and database. If this is a response to peer review, itemize the changes made to the review suggestions                   |

**Database**

CENTRAL, MEDLINE, Embase, Ageline, CINAHL, International Pharmaceutical Abstracts, PsychInfo, and Scopus

**Interface**

Ovid, EBSCO, Elsevier

**Research Question**

What is the extent of adverse drug reactions (ADRs) or adverse drug events (ADEs) in frail older adults related to their heart failure (HF) treatment?

- (i) What is the prevalence, type and severity of ADRs or ADEs with HF treatment in frail older adults compared to non-frail older adults?

**PICO Format**

PICOS: Population (frail older adults), Intervention (heart failure medication treatment), Comparator (non-frail older adults), Outcome (ADRs or ADEs), Study Design (systematic review and meta-analysis)

## P I C O S Inclusion Criteria

*(List criteria such as age groups, study designs, etc., to be included) [optional]*

Include randomised controlled trials (RCTs); controlled before-and-after trials; interrupted time series; or meta-analysis; or observational studies (cohort, case-control or cross sectional studies). Studies measuring ADR or ADE with definitions and/or causality assessment criteria; or studies focused on ADRs or ADEs secondary to a specific medication or pharmacological class; or specific ADR or ADE.

Population:

- (i) Include only people aged 65 years or older or must separately report outcomes for people aged 65 years or older;
- ( ) Include people with a primary diagnosis of HF, with disease severity based on the New York Association (NYHA) classification and included persons with mild to severe functional limitations (NYHA grade II-IV). Studies may include people treated for HF in various settings (e.g. hospitalised with HF, receiving care in a nursing home or living independently in the community);
- (i) Include studies reporting ADRs or ADEs with definition and/or causality assessment criteria;
- (ii) Include only people described as being frail or must separately report outcomes for people described as frail, with a frailty measurement using objective criteria. The term 'frail' must be justified using systematically defined criteria (e.g. the Cardiovascular Health Study Criteria (Fried 2001), Frailty Index score (Mitnitski 2004), CSHA Clinical Frailty Score (Rockwood 2005), frailty phenotype, difficulty performing specified tasks, require assisted living arrangements (e.g. nursing home resident), or other measures of vulnerability).

## Exclusion Criteria

*(List criteria such as study designs, date limits, etc., to be excluded) [optional]*

Exclude qualitative studies, self-reports, case reports, case series, expert opinion or reviews. Exclude trials of pharmacotherapy with cardiovascular agents for indications other than heart failure (e.g., hypertension, angina, atrial fibrillation, stroke, previous myocardial infarction, liver failure, heart rate control, chronic kidney disease).

## Was a search filter applied?

Yes x No

**If YES, which one(s) (e.g., Cochrane RCT filter, PubMed Clinical Queries filter)? Provide the source if this is a published filter. [mandatory if YES to previous question — textbox]**

The search filters for drug interventions, free texts and index terms used to describe ADRs or ADEs were adapted from a [Cochrane RCT filter](#) for adverse effects by Golder S et. al. 2019.

Golder, S., Peryer, G. and Loke, Y.K., 2019. Overview: comprehensive and carefully constructed strategies are required when conducting searches for adverse effects data. *Journal of clinical epidemiology*, 113, pp.36-43.

Other notes or comments you feel would be useful for the peer reviewer? *[optional]*

There are 8 search strategies for review included below. The Scopus strategy includes both the original strategy (1002 results) and followed your truncated recommended strategy (3 results) for comparison.

1. Database: Ovid MEDLINE(R) ALL <1946 to May 10, 2021> Search Strategy:

-----  
1 ae.fs. [adverse effects] (1795345)  
2 co.fs. [complications] (2031160)  
3 de.fs. [drug effects] (3065572)  
4 safe.ti,ab. (390361)  
5 safety.ti,ab. (549367)  
6 undesirable effect\*.ti,ab. (3134)  
7 treatment emergent.ti,ab. (5485)  
8 tolerability.ti,ab. (51701)  
9 toxicity.ti,ab. (397618)  
10 adrs.ti,ab. (4453)  
11 (adverse adj2 (effect or effects or reaction or reactions or event or events or outcome or outcomes)).ti,ab. (469244)  
12 ((adverse or undesirable or harms\* or serious or toxic) adj3 (effect\* or reaction\* or event\* or outcome\*)),ti,ab. (555986)  
13 abnormalities, drug induced/ (14613)  
14 adverse drug reaction reporting systems/ (7885)  
15 drug hypersensitivity/ (23972)  
16 drug monitoring/ (21789)  
17 "Drug-Related Side Effects and Adverse Reactions"/ (33494)  
18 long term adverse effects/ (665)  
19 safety-based drug withdrawals/ (401)  
20 1 or 2 or 3 or 4 or 5 or 6 or 7 or 8 or 9 or 10 or 11 or 12 or 13 or 14 or 15 or 16 or 17 or 18 or 19 (7317665)  
21 exp heart failure/ (127020)  
22 cardiac failure/ (123841)  
23 congestive heart failure.ti,ab. (39034)  
24 ((heart or cardiac) adj1 (failure\* or decompensation or de-compensation)).ti,ab. (187456)  
25 21 or 22 or 23 or 24 (224141)  
26 Aged/ (3193985)  
27 "Aged, 80 and over"/ (958294)  
28 Aging/ (234832)  
29 elderly.ti,ab. (255685)  
30 26 or 27 or 28 or 29 (3450978)  
31 Frailty/ (4024)  
32 Frail Elderly/ (12394)  
33 frail\*.ti,ab. (24904)  
34 31 or 32 or 33 (29450)  
35 20 and 25 and 30 and 34 (292)  
36 limit 35 to (abstracts and english language and humans and yr="1960 - Current") (249)  
\*\*\*\*\*

2. Database: Embase Classic Search Strategy <1947 to 1973>, Embase <1974 to 2021 May 10>:

-----  
1 ae.fs. [adverse drug reaction] (1279182)  
2 co.fs. [complications] (1762058)  
3 complication/ (257660)  
4 de.fs. [drug effects] (4641)  
5 drug effect/ (777253)  
6 safe.ti,ab. (600910)  
7 safety.ti,ab. (863531)  
8 side-effect\*.ti,ab. (405321)  
9 undesirable effect\*.ti,ab. (4646)  
10 treatment emergent.ti,ab. (13119)  
11 tolerability.ti,ab. (94657)  
12 drug tolerance/ (37525)  
13 toxicity.ti,ab. (568321)  
14 adrs.ti,ab. (9010)  
15 (adverse adj2 (effect or effects or reaction or reactions or event or events or outcome or outcomes)).ti,ab. (746854)  
16 ((adverse or undesirable or harm\*) adj3 (effect\* or reaction\* or event\* or outcome\*)),ti,ab. (793990)  
17 Adverse drug reaction/ (256528)  
18 drug hypersensitivity/ (52416)

19 drug monitoring/ (55747)  
 20 drug safety/ (449977)  
 21 drug surveillance program/ (26572)  
 22 drug toxicity/ (82463)  
 23 side effect/ (341162)  
 24 1 or 2 or 3 or 4 or 5 or 6 or 7 or 8 or 9 or 10 or 11 or 12 or 13 or 14 or 15 or 16 or 17 or 18 or 19 or 20 or 21 or 22 or 23 (5961708)  
 25 exp heart failure/ (557204)  
 26 cardiac failure/ (252983)  
 27 congestive heart failure.ti,ab. (58137)  
 28 ((heart or cardiac) adj1 (failure\* or decompensation or de-compensation)).ti,ab. (322544) 29  
 25 or 26 or 27 or 28 (609709)  
 30 Aged/ (3225396)  
 31 elderly.ti,ab. (374141)  
 32 Aging/ (285761)  
 33 (older adj1 (adult\* or people)).ti,ab. (149062) 34  
 30 or 31 or 32 or 33 (3515290)  
 35 Frailty/ (15053)  
 36 Frail Elderly/ (10791)  
 37 frail\*.ti,ab. (38640)  
 38 35 or 36 or 37 (44117)  
 39 24 and 29 and 34 and 38 (742)  
 40 limit 39 to (abstracts and human and english language and yr="1960 -Current") (683)  
 \*\*\*\*\*

3. Database: EBM Reviews - Cochrane Central Register of Controlled Trials Search Strategy <April 2021>:

1 ae.fs. [adverse effects] (130832)  
 2 co.fs. [complications] (55061)  
 3 de.fs. [drug effects] (122139)  
 4 safe.ti,ab. (70565)  
 5 safety.ti,ab. (233410)  
 6 undesirable effect\*.ti,ab. (393)  
 7 treatment emergent.ti,ab. (8586)  
 8 tolerability.ti,ab. (56827)  
 9 toxicity.ti,ab. (37922)  
 10 adrs.ti,ab. (668)  
 11 (adverse adj2 (effect or effects or reaction or reactions or event or events or outcome or outcomes)).ti,ab. (173281)  
 12 ((adverse or undesirable or harms\* or serious or toxic) adj3 (effect\* or reaction\* or event\* or outcome\*)).ti,ab. (182109)  
 13 abnormalities, drug induced/ (46)  
 14 adverse drug reaction reporting systems/ (90)  
 15 drug hypersensitivity/ (456)  
 16 drug monitoring/ (1842)  
 17 "Drug-Related Side Effects and Adverse Reactions"/ (1587)  
 18 long term adverse effects/ (38)  
 19 safety-based drug withdrawals/ (5)  
 20 1 or 2 or 3 or 4 or 5 or 6 or 7 or 8 or 9 or 10 or 11 or 12 or 13 or 14 or 15 or 16 or 17 or 18 or 19 (576828)  
 21 exp heart failure/ (9710)  
 22 cardiac failure/ (9456)  
 23 congestive heart failure.ti,ab. (5309)  
 24 ((heart or cardiac) adj1 (failure\* or decompensation or de-compensation)).ti,ab. (29012)  
 25 21 or 22 or 23 or 24 (30020)  
 26 Aged/ (213960)  
 27 "Aged, 80 and over"/ (55094)  
 28 Aging/ (3712)  
 29 elderly.ti,ab. (46908)  
 30 26 or 27 or 28 or 29 (251440)  
 31 Frailty/ (168)  
 32 Frail Elderly/ (742)  
 33 frail\*.ti,ab. (3841)  
 34 31 or 32 or 33 (4022)  
 35 20 and 25 and 30 and 34 (41)  
 36 limit 35 to (abstracts and english language and humans and yr="1960 - Current") [Limit not valid; records were

retained] (33)

\*\*\*\*\*

4. Database: International Pharmaceutical Abstracts Search Strategy <1970 to April 2021>:

- 
- 1 complication\*.mp. (12712)
  - 2 co.fs. [complications] (3) 3
  - safe.ti,ab. (15069)
  - 4 safety.ti,ab. (41356)
  - 5 undesirable effect\*.ti,ab. (171)
  - 6 treatment emergent.ti,ab. (1083)
  - 7 tolerability.ti,ab. (8831)
  - 8 toxicity.ti,ab. (24797)
  - 9 adrs.ti,ab. (1427)
  - 10 (adverse adj2 (effect or effects or reaction or reactions or event or events or outcome or outcomes)).ti,ab. (46682)
  - 11 ((adverse or undesirable or harms\* or serious or toxic) adj3 (effect\* or reaction\* or event\* or outcome\*)),ti,ab. (51217)
  - 12 [hypersensitivity.mp.](#) (2331)
  - 13 (drug adj1 monitoring).mp. (3037)
  - 14 1 or 2 or 3 or 4 or 5 or 6 or 7 or 8 or 9 or 10 or 11 or 12 or 13 (121796)
  - 15 heart [failure.mp.](#) (7007)
  - 16 cardiac [failure.mp.](#) (321)
  - 17 (congestive adj1 heart adj1 failure).mp. (2118)
  - 18 ((heart or cardiac) adj1 (failure\* or decompensation or de-compensation)).ti,ab. (6763)
  - 19 15 or 16 or 17 or 18 (7221)
  - 20 Aged.mp. (18831)
  - 21 senior\*.mp. (1100)
  - 22 [geriatric.mp.](#) (2300)
  - 23 elderly.ti,ab. (9583)
  - 24 Aging.mp. (2966)
  - 25 (older adj1 (adult\* or people)).ti,ab. (1937)
  - 26 20 or 21 or 22 or 23 or 24 or 25 (32065)
  - 27 [frailty.mp.](#) (148)
  - 28 frail\*.ti,ab. (337)
  - 29 (Frail adj1 Elderly).mp. (87)
  - 30 27 or 28 or 29 (337)
  - 31 14 and 19 and 26 and 30 (9)
- \*\*\*\*\*

5. Database: APA PsycInfo Search Strategy\*\*\* <1806 to April Week 4 2021> (post-validation update 18.05.21):

- 
- 1 exp "Side Effects (Drug)" / (59848)
  - 2 exp Geriatrics/ (14589)
  - 3 exp Aging/ (82944)
  - 4 exp Older Adulthood/ (9084)
  - 5 exp Geriatric Patients/ (13895)
  - 6 complication\*.mp. (35270)
  - 7 safe.ti,ab. (35178)
  - 8 safety.ti,ab. (69507)
  - 9 undesirable effect\*.ti,ab. (375)
  - 10 treatment emergent.ti,ab. (1370)
  - 11 tolerability.ti,ab. (7550)
  - 12 toxicity.ti,ab. (9191)
  - 13 adrs.ti,ab. (314)
  - 14 (adverse adj2 (effect or effects or reaction or reactions or event or events or outcome or outcomes)).ti,ab. (42990)
  - 15 ((adverse or undesirable or harms\* or serious or toxic) adj3 (effect\* or reaction\* or event\* or outcome\*)),ti,ab. (49914)
  - 16 [hypersensitivity.mp.](#) (4769)
  - 17 (drug adj1 monitoring).mp. (1777)
  - 18 6 or 7 or 8 or 9 or 10 or 11 or 12 or 13 or 14 or 15 or 16 or 17 (184728)
  - 19 heart [failure.mp.](#) (4454)
  - 20 cardiac [failure.mp.](#) (144)
  - 21 (congestive adj1 heart adj1 failure).mp. (959)
  - 22 ((heart or cardiac) adj1 (failure\* or decompensation or de-compensation)).ti,ab. (4293)
  - 23 19 or 20 or 21 or 22 (4597)
  - 24 Aged.mp. (620776)

- 25 senior\*.mp. (30626)
- 26 [geriatric.mp.](#) (39958)
- 27 elderly.ti,ab. (59882)
- 28 Aging.mp. (114591)
- 29 (older adj1 (adult\* or people)).ti,ab. (67473)
- 30 24 or 25 or 26 or 27 or 28 or 29 (742406)
- 31 [frailty.mp.](#) (2708)
- 32 frail\*.ti,ab. (5180)
- 33 (Frail adj1 Elderly).mp. (2591)
- 34 31 or 32 or 33 (6172)
- 35 18 and 23 and 30 and 34 (8)
- 36 limit 35 to (human and english language and abstracts and yr="1960 -Current") (7)
- 37 1 or 18 (232116)
- 38 2 or 3 or 4 or 5 or 30 (752758)
- 39 23 and 34 and 37 and 38 (7)

\*\*\*\*\*

\*\*\**(Use of subject headings and keyword searches applied post-validation to PsychInfo and CINAHL – search strategy was updated May 18, 2021)*

## 6. EBSCO CINAHL Search\*\*\*

CINAHL Search Strategy 11.05.21 (post-validation update 18.05.21)

| #   | Query                                                                                                                                                                                                                                           | Results   |
|-----|-------------------------------------------------------------------------------------------------------------------------------------------------------------------------------------------------------------------------------------------------|-----------|
| S60 | S37 AND S44 AND S52 AND S58                                                                                                                                                                                                                     | 85        |
| S59 | S37 AND S44 AND S52 AND S58                                                                                                                                                                                                                     | 85        |
| S58 | S53 OR S54 OR S55 OR S56 OR S57                                                                                                                                                                                                                 | 17,336    |
| S57 | (MH "Frail Elderly")                                                                                                                                                                                                                            | 7,894     |
| S56 | (MH "Frailty Syndrome")                                                                                                                                                                                                                         | 2,728     |
| S55 | TI frail* OR AB frail*                                                                                                                                                                                                                          | 13,956    |
| S54 | TI Frail Elderly OR AB Frail Elderly                                                                                                                                                                                                            | 2,154     |
| S53 | TI Frailty OR AB Frailty                                                                                                                                                                                                                        | 8,610     |
| S52 | S45 OR S46 OR S47 OR S48 OR S49 OR S50 OR S51                                                                                                                                                                                                   | 1,060,605 |
| S51 | (MH "Aged, 80 and Over+")                                                                                                                                                                                                                       | 306,998   |
| S50 | (MH "Aged+")                                                                                                                                                                                                                                    | 868,914   |
| S49 | TI older people OR AB older people                                                                                                                                                                                                              | 29,655    |
| S48 | TI older adult* OR AB older adult*                                                                                                                                                                                                              | 69,173    |
| S47 | TI Aging OR AB Aging                                                                                                                                                                                                                            | 60,990    |
| S46 | TI elderly OR AB elderly                                                                                                                                                                                                                        | 94,046    |
| S45 | TI Aged OR AB Aged                                                                                                                                                                                                                              | 196,047   |
| S44 | S38 OR S39 OR S40 OR S41 OR S42 OR S43                                                                                                                                                                                                          | 70,616    |
| S43 | (MH "Heart Failure+")                                                                                                                                                                                                                           | 44,053    |
| S42 | TI cardiac decompensation OR AB cardiac decompensation                                                                                                                                                                                          | 173       |
| S41 | TI heart decompensation OR AB heart decompensation                                                                                                                                                                                              | 171       |
| S40 | TI congestive heart failure OR AB congestive heart failure                                                                                                                                                                                      | 8,730     |
| S39 | TI cardiac failure OR AB cardiac failure                                                                                                                                                                                                        | 5,533     |
| S38 | TI heart failure OR AB heart failure                                                                                                                                                                                                            | 55,919    |
| S37 | S1 OR S2 OR S3 OR S4 OR S5 OR S6 OR S7 OR S8 OR S9 OR S10 OR S11 OR S12 OR S13 OR S14 OR S15 OR S16 OR S17 OR S18 OR S19 OR S20 OR S21 OR S22 OR S23 OR S24 OR S25 OR S26 OR S27 OR S28 OR S29 OR S30 OR S31 OR S32 OR S33 OR S34 OR S35 OR S36 | 707,683   |
| S36 | (MH "Substance Withdrawal, Controlled")                                                                                                                                                                                                         | 989       |
| S35 | (MH "Drug Monitoring")                                                                                                                                                                                                                          | 8,073     |
| S34 | (MH "Drug Hypersensitivity+")                                                                                                                                                                                                                   | 7,131     |
| S33 | (MH "Abnormalities, Drug-Induced")                                                                                                                                                                                                              | 1,220     |
| S32 | (MH "Drug Toxicity+")                                                                                                                                                                                                                           | 17,121    |
| S31 | (MH "Medication Side Effects (Saba CCC)")                                                                                                                                                                                                       | 1         |
| S30 | (MH "Treatment Complications, Delayed")                                                                                                                                                                                                         | 2,330     |
| S29 | (MH "Adverse Drug Event+")                                                                                                                                                                                                                      | 30,554    |
| S28 | (MH "Adverse Health Care Event+")                                                                                                                                                                                                               | 69,136    |
| S27 | TI long term adverse effects OR AB long term adverse effects                                                                                                                                                                                    | 1,010     |



|     |                                                                                          |         |
|-----|------------------------------------------------------------------------------------------|---------|
| S26 | TI abnormalities, drug induced OR AB abnormalities, drug induced                         | 26      |
| S25 | TI unexpected event* OR AB unexpected event*                                             | 821     |
| S24 | TI unexpected effect* OR AB unexpected effect*                                           | 561     |
| S23 | TI undesirable event* OR AB undesirable event*                                           | 116     |
| S22 | TI adverse outcome OR AB adverse outcome                                                 | 26,879  |
| S21 | TI drug toxicity OR AB drug toxicity                                                     | 2,673   |
| S20 | TI drug monitoring OR AB drug monitoring                                                 | 3,994   |
| S19 | TI drug hypersensitivity OR AB drug hypersensitivity                                     | 534     |
| S18 | TI adverse drug reaction reporting systems OR AB adverse drug reaction reporting systems | 44      |
| S17 | TI safety OR AB safety                                                                   | 191,313 |
| S16 | TI safe OR AB safe                                                                       | 104,894 |
| S15 | TI toxicity OR AB toxicity                                                               | 45,064  |
| S14 | TI tolerability OR AB tolerability                                                       | 13,859  |
| S13 | TI treatment emergent OR AB treatment emergent                                           | 2,277   |
| S12 | TI undesirable effect* OR AB undesirable effect*                                         | 903     |
| S11 | TI side effect* OR AB side effect*                                                       | 47,054  |
| S10 | TI harm* OR AB harm*                                                                     | 58,479  |
| S9  | TI complication* OR AB complication*                                                     | 202,940 |
| S8  | TI adverse outcome* OR AB adverse outcome*                                               | 29,644  |
| S7  | TI adverse event* OR AB adverse event*                                                   | 67,876  |
| S6  | TI adverse reaction* OR AB adverse reaction*                                             | 11,763  |
| S5  | TI adverse drug effect* OR AB adverse drug effect*                                       | 2,673   |
| S4  | TI adrs OR AB adrs                                                                       | 1,853   |
| S3  | TI adverse effect* OR AB adverse effect*                                                 | 43,275  |
| S2  | TI adverse drug event* OR AB adverse drug event*                                         | 4,751   |
| S1  | TI adverse drug reaction* OR AB adverse drug reaction*                                   | 5,105   |

\*\*\**(Use of subject headings and keyword searches applied post-validation to PsychInfo and CINAHL – search strategy was updated May 18, 2021)*

## 7. EBSCO Ageline Search 11.05.21

| #   | Query                                                                                                                                  | Results |
|-----|----------------------------------------------------------------------------------------------------------------------------------------|---------|
| S41 | S22 AND S28 AND S36 AND S40                                                                                                            | 15      |
| S40 | S37 OR S38 OR S39                                                                                                                      | 6,329   |
| S39 | frail*                                                                                                                                 | 6,329   |
| S38 | Frail Elderly                                                                                                                          | 4,250   |
| S37 | Frailty                                                                                                                                | 2,443   |
| S36 | S29 OR S30 OR S31 OR S32 OR S33 OR S34 OR S35                                                                                          | 161,951 |
| S35 | older people                                                                                                                           | 129,446 |
| S34 | older adult*                                                                                                                           | 134,359 |
| S33 | geriatric*                                                                                                                             | 38,829  |
| S32 | senior*                                                                                                                                | 9,336   |
| S31 | Aging                                                                                                                                  | 75,697  |
| S30 | elderly                                                                                                                                | 131,510 |
| S29 | Aged                                                                                                                                   | 138,398 |
| S28 | S23 OR S24 OR S25 OR S26 OR S27                                                                                                        | 1,266   |
| S27 | cardiac decompensation                                                                                                                 | 3       |
| S26 | heart decompensation                                                                                                                   | 4       |
| S25 | congestive heart failure                                                                                                               | 970     |
| S24 | cardiac failure                                                                                                                        | 697     |
| S23 | heart failure                                                                                                                          | 1,253   |
| S22 | S1 OR S2 OR S3 OR S4 OR S5 OR S6 OR S7 OR S8 OR S9 OR S10 OR S11 OR S12 OR S13 OR S14 OR S15 OR S16 OR S17 OR S18 OR S19 OR S20 OR S21 | 12,291  |
| S21 | long term adverse effects                                                                                                              | 13      |
| S20 | unexpected event*                                                                                                                      | 22      |
| S19 | undesirable event*                                                                                                                     | 21      |
| S18 | drug toxicity                                                                                                                          | 45      |
| S17 | drug monitoring                                                                                                                        | 89      |
| S16 | drug hypersensitivity                                                                                                                  | 1       |
| S15 | safety                                                                                                                                 | 4,983   |
| S14 | safe                                                                                                                                   | 1,899   |
| S13 | treatment emergent                                                                                                                     | 21      |
| S12 | undesirable effect*                                                                                                                    | 26      |
| S11 | side effect*                                                                                                                           | 1,514   |
| S10 | harm*                                                                                                                                  | 1,806   |
| S9  | complication*                                                                                                                          | 1,532   |
| S8  | adverse outcome*                                                                                                                       | 691     |
| S7  | adverse event*                                                                                                                         | 818     |
| S6  | adverse reaction*                                                                                                                      | 460     |
| S5  | adverse drug effect*                                                                                                                   | 120     |
| S4  | ADRs                                                                                                                                   | 61      |
| S3  | adverse effect*                                                                                                                        | 863     |
| S2  | adverse drug event*                                                                                                                    | 356     |
| S1  | "adverse drug reaction*"                                                                                                               | 384     |

## **8. Elsevier Scopus Search**

### **(Original)**

#### **1. ADRs and ADEs**

*Drug intervention filters - (adapted from Golder 2019)*

(adverse AND drug AND reaction\*) OR (adverse AND drug AND event\*) OR (adverse AND effect\*) OR adrs  
OR (adverse AND drug AND effect\*) OR (adverse AND reaction\*) OR (adverse AND event\*) OR (adverse  
AND outcome\*) OR complication\* OR harm\* OR side-effect\* OR (undesirable AND effect\*) OR  
(treatment AND emergent) OR tolerability OR toxicity OR safe OR safety OR (adverse AND drug AND  
reaction AND reporting AND systems) OR (drug AND hypersensitivity) OR (drug AND monitoring) OR (drug  
AND toxicity) OR (undesirable AND event\*) OR (unexpected AND effect\*) OR (unexpected AND event\*)  
OR (abnormalities AND drug AND induced) OR (long AND term AND adverse AND effects)

#### **2. Heart Failure**

(heart AND failure) OR (cardiac AND failure) OR (congestive AND heart AND failure) OR (heart AND  
decompensation) OR (cardiac AND decompensation)

#### **3. Elderly**

Aged OR elderly OR Aging OR (older AND adult\*) OR (older AND people)

#### **4a. Frailty**

Frailty OR (Frail AND Elderly) OR frail\*

*-1002 document results*

**(Peer reviewed Truncated recommendations and results)**

**1. ADRs and ADEs**

((adverse OR undesirable OR unexpected) AND (effect\* OR event\* OR reaction\* OR outcome\*)) OR ADRS OR "adverse drug reaction reporting system\*" OR ((drug\* OR treatment) AND (hypersensitive\* OR hyper-sensitiv\* OR monitoring OR toxicity OR tolerability OR safe\* OR abnormalit\* OR harm\* OR side-effect\* OR reaction\* OR event\* OR effect\* OR complication\* OR emergent))

**2. Heart Failure**

((heart OR cardiac) AND (failure OR decompensation))

**3. Elderly**

Elderly OR Age\* OR (older AND (adult\* OR people OR person\*)) (392

*document results retrieved)*

**0. Frailty**

Frailty OR (Frail AND Elderly) OR frail\*

*(3 document results retrieved)*

**PEER REVIEW ASSESSMENT: THIS SECTION TO BE FILLED IN BY THE REVIEWER**

|                       |                          |                                                                                                       |                                       |
|-----------------------|--------------------------|-------------------------------------------------------------------------------------------------------|---------------------------------------|
| Dr Yulia Ulyannikova  |                          | <b>Email:</b><br><a href="mailto:yulia.ulyannikova@sydney.edu.au">yulia.ulyannikova@sydney.edu.au</a> | <b>Date completed:</b><br>14 May 2021 |
| <b>1. TRANSLATION</b> |                          |                                                                                                       |                                       |
|                       | A. No revisions          | <input checked="" type="checkbox"/>                                                                   |                                       |
|                       | B. Revision(s) suggested | <input type="checkbox"/>                                                                              |                                       |
|                       | C. Revision(s) required  | <input type="checkbox"/>                                                                              |                                       |

If “B” or “C,” please provide an explanation or example:

|                                           |                          |                                     |  |
|-------------------------------------------|--------------------------|-------------------------------------|--|
| <b>2. BOOLEAN AND PROXIMITY OPERATORS</b> |                          |                                     |  |
|                                           | A. No revisions          | <input checked="" type="checkbox"/> |  |
|                                           | B. Revision(s) suggested | <input type="checkbox"/>            |  |
|                                           | C. Revision(s) required  | <input type="checkbox"/>            |  |

If “B” or “C,” please provide an explanation or example:

If “B” or “C,” please provide an explanation or example:

|                            |                          |                                     |  |
|----------------------------|--------------------------|-------------------------------------|--|
| <b>3. SUBJECT HEADINGS</b> |                          |                                     |  |
|                            | A. No revisions          | <input type="checkbox"/>            |  |
|                            | B. Revision(s) suggested | <input type="checkbox"/>            |  |
|                            | C. Revision(s) required  | <input checked="" type="checkbox"/> |  |

PsycInfo is a database with a thesaurus. Currently the search includes no subject headings.

CINAHL is a database with a thesaurus, currently the search includes no subject headings

|                               |                          |                                     |  |
|-------------------------------|--------------------------|-------------------------------------|--|
| <b>4. TEXT WORD SEARCHING</b> |                          |                                     |  |
|                               | A. No revisions          | <input checked="" type="checkbox"/> |  |
|                               | B. Revision(s) suggested | <input type="checkbox"/>            |  |
|                               | C. Revision(s) required  | <input type="checkbox"/>            |  |

If “B” or “C,” please provide an explanation or example:

| 5. SPELLING, SYNTAX, AND LINE NUMBERS |                          |                                     |  |
|---------------------------------------|--------------------------|-------------------------------------|--|
|                                       | A. No revisions          | <input checked="" type="checkbox"/> |  |
|                                       | B. Revision(s) suggested | <input type="checkbox"/>            |  |
|                                       | C. Revision(s) required  | <input type="checkbox"/>            |  |

If “B” or “C,” please provide an explanation or example:

| 6. LIMITS AND FILTERS |                          |                                     |  |
|-----------------------|--------------------------|-------------------------------------|--|
|                       | A. No revisions          | <input checked="" type="checkbox"/> |  |
|                       | B. Revision(s) suggested | <input type="checkbox"/>            |  |
|                       | C. Revision(s) required  | <input type="checkbox"/>            |  |

If “B” or “C,” please provide an explanation or example:

| 7. OVERALL EVALUATION (Note: If one or more “revision required” is noted above, the response below must be “revisions required”.) |                          |                                     |  |
|-----------------------------------------------------------------------------------------------------------------------------------|--------------------------|-------------------------------------|--|
|                                                                                                                                   | A. No revisions          | <input type="checkbox"/>            |  |
|                                                                                                                                   | B. Revision(s) suggested | <input type="checkbox"/>            |  |
|                                                                                                                                   | C. Revision(s) required  | <input checked="" type="checkbox"/> |  |

If “B” or “C,” please provide an explanation or example:

Add subject heading search to PsychInfo and CINAHL search strategies. Use keyword searches with subject headings.

\*\*\*(Use of subject headings and keyword searches applied post-validation to PsychInfo and CINAHL – search strategy was updated May 18, 2021)

**Table S3 Eligible guideline directed heart failure specific medications in search strategy**

| <b>Drug class</b>                                         | <b>Example of medications</b>                    |
|-----------------------------------------------------------|--------------------------------------------------|
| angiotensin-converting enzyme inhibitors (ACEIs)          | enalapril                                        |
| angiotensin-2 receptor antagonists/blockers (ARBs)        | candesartan                                      |
| angiotensin receptor neprilysin inhibitor (ARNI)          | sacubitril/valsartan                             |
| aldosterone/mineralocorticoid receptor antagonists (MRAs) | spironolactone, eplerenone                       |
| renin inhibitor                                           | aliskiren                                        |
| beta-blockers                                             | bisoprolol                                       |
| renin inhibitor                                           | aliskiren                                        |
| diuretics                                                 | furosemide                                       |
| calcium channel blockers (CCBs)                           | verapamil, diltiazem                             |
| cardiac glycosides                                        | digoxin                                          |
| inotropes/adrenergic agonists                             | dobutamine, dopamine                             |
| If channel inhibitors                                     | ivabradine                                       |
| SGLT-2 inhibitors                                         | dapagliflozin, empagliflozin                     |
| vasodilators                                              | nitroglycerin, isosorbide dinitrate, hydralazine |

Note: The treatments can be administered alone or in combination; in fixed or titrated (up/down) regimens

Figure S1 Risk of bias assessment: ROBINS-I summary for non-randomised intervention studies

|       |               | Risk of bias domains |    |    |    |    |    |    |         |
|-------|---------------|----------------------|----|----|----|----|----|----|---------|
|       |               | D1                   | D2 | D3 | D4 | D5 | D6 | D7 | Overall |
| Study | Dewan 2020    | +                    | +  | +  | +  | -  | +  | +  | -       |
|       | Ekerstad 2017 | -                    | X  | X  | -  | -  | +  | +  | X       |
|       | Vidan 2016    | -                    | -  | +  | +  | +  | -  | +  | -       |

Domains:  
D1: Bias due to confounding.  
D2: Bias due to selection of participants.  
D3: Bias in classification of interventions.  
D4: Bias due to deviations from intended interventions.  
D5: Bias due to missing data.  
D6: Bias in measurement of outcomes.  
D7: Bias in selection of the reported result.

Judgement  
X Serious  
- Moderate  
+ Low

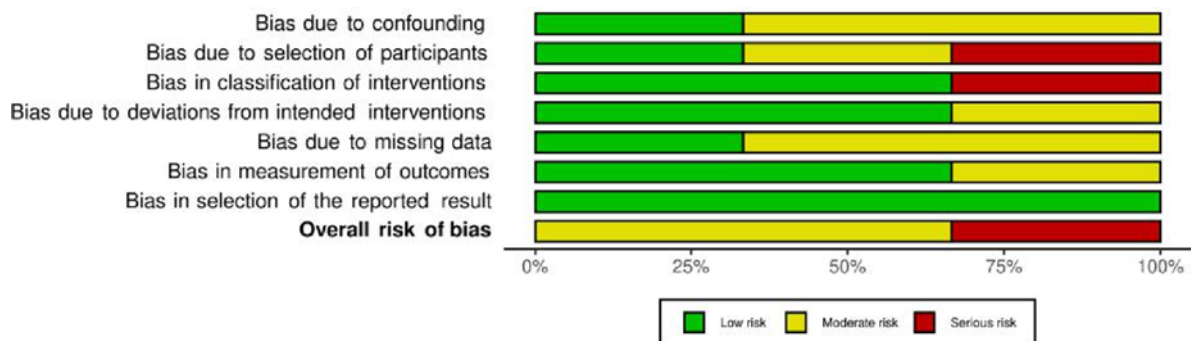



**Table S4:** GRADE criteria and scoring

**Table S4a:** GRADE Assessment Criteria

Each of the domains were assessed from “high” quality evidence and given downgrade or upgrade points accordingly.

|                                                                                                                                                                                                                                                                                                                                                             | Domain                                | Description                                                                                                                                                                                                                                                                                                                            | No downgrade given (0) if:                                                                                                                                                                 | Downgrade given by one level (-1) if:                                                                                                                                                             |
|-------------------------------------------------------------------------------------------------------------------------------------------------------------------------------------------------------------------------------------------------------------------------------------------------------------------------------------------------------------|---------------------------------------|----------------------------------------------------------------------------------------------------------------------------------------------------------------------------------------------------------------------------------------------------------------------------------------------------------------------------------------|--------------------------------------------------------------------------------------------------------------------------------------------------------------------------------------------|---------------------------------------------------------------------------------------------------------------------------------------------------------------------------------------------------|
| <b>Factors that can downgrade the quality of evidence include:</b>                                                                                                                                                                                                                                                                                          |                                       |                                                                                                                                                                                                                                                                                                                                        |                                                                                                                                                                                            |                                                                                                                                                                                                   |
| 1                                                                                                                                                                                                                                                                                                                                                           | <b>Study design</b>                   | Randomised controlled trials (0) and observational studies (-1) were included in this review.                                                                                                                                                                                                                                          | Studies were RCTs.                                                                                                                                                                         | Studies were observational in design.                                                                                                                                                             |
| 2                                                                                                                                                                                                                                                                                                                                                           | <b>Risk of bias/ study limitation</b> | Study limitations were determined with the Cochrane risk of bias assessment tool ROB-2 for RCTs and ROBINS-I for observational studies.                                                                                                                                                                                                | Studies had “low” overall risk of bias score.                                                                                                                                              | Studies had “moderate” or “high” overall risk of bias score.                                                                                                                                      |
| 3                                                                                                                                                                                                                                                                                                                                                           | <b>*Inconsistency</b>                 | Inconsistency was based on presence of statistical heterogeneity (I <sup>2</sup> ) but was not performed in this review’s narrative analysis. We did not conduct a meta-analysis. Investigators were unable to determine the differences in underlying treatment effect nor identify a plausible explanation if heterogeneity existed. | Inconsistency was not present.                                                                                                                                                             | All outcomes were downgraded since investigators unable to demonstrate if statistical heterogeneity was present.                                                                                  |
| 4                                                                                                                                                                                                                                                                                                                                                           | <b>Indirectness</b>                   | Indirectness was evaluated using the PICO format to determine how well the evidence included in the review answered the research question, including:<br>Population: older age, frailty<br>Intervention: HF specific medication<br>Comparator: non-frail older adults<br>Outcome: ADR or ADE                                           | Indirectness was not observed.                                                                                                                                                             | Indirectness was present in either population, intervention comparator or outcomes.                                                                                                               |
| 5                                                                                                                                                                                                                                                                                                                                                           | <b>Imprecision</b>                    | Imprecision was evaluated on optimal information size implication and variation in the effect observed from confidence intervals.                                                                                                                                                                                                      | There were narrow confidence intervals around the point estimate, if null effect and appreciable harm or benefit were both not included or if confidence interval excludes point estimate. | No point estimate given, if there were wide confidence intervals around the point estimate, or if confidence intervals do not include the null effect but do include appreciable harm or benefit. |
| 6                                                                                                                                                                                                                                                                                                                                                           | <b>*Publication bias</b>              | Publication bias was a systematic under or over estimate of the underlying effect due to the selective publication of studies or availability of their data.<br>We did not perform a meta-analysis so did not assess publication bias because funnel plots were not generated in a narrative synthesis.                                | Publication bias was not observed.                                                                                                                                                         | All outcomes were downgraded because publication bias is strongly suspected in a very small (scarce) number of studies despite absence of a funnel plot.                                          |
| <b>Factors that can upgrade the quality of evidence by one level:</b>                                                                                                                                                                                                                                                                                       |                                       |                                                                                                                                                                                                                                                                                                                                        |                                                                                                                                                                                            |                                                                                                                                                                                                   |
| <ul style="list-style-type: none"> <li>- if dose-response gradient or relationship was observed in frail compared to non-frail participants,</li> <li>- if demonstrated large or very large effects,</li> <li>- if all plausible residual confounders would reduce a demonstrated effect or suggest a spurious effect if no effect was observed.</li> </ul> |                                       |                                                                                                                                                                                                                                                                                                                                        |                                                                                                                                                                                            |                                                                                                                                                                                                   |

\*NA – not applicable since no meta-analysis and subgroup analysis was performed.

**Table S4b:** Definition of grades of evidence <sup>21</sup>

| Score           | Rationale for scoring overall quality of evidence                                                                                             |
|-----------------|-----------------------------------------------------------------------------------------------------------------------------------------------|
| <b>High</b>     | further research is very unlikely to change the confidence in the estimate of effect.                                                         |
| <b>Moderate</b> | further research is likely to have an important impact on the confidence in the estimate of effect and may change the estimate.               |
| <b>Low</b>      | further research is very likely to have an important impact on our confidence in the estimate of effect and is likely to change the estimate. |
| <b>Very Low</b> | any estimate of effect is very uncertain.                                                                                                     |

**Table S4c. GRADE Scoring**

| Outcome                                                                                                                                                                                                | Study Design | Risk of Bias | *Inconsistency | Indirectness | Imprecision | *Publication bias | Overall Score |
|--------------------------------------------------------------------------------------------------------------------------------------------------------------------------------------------------------|--------------|--------------|----------------|--------------|-------------|-------------------|---------------|
| <i>Renin angiotensin system inhibitors (Dewan et al. 2020)</i>                                                                                                                                         |              |              |                |              |             |                   |               |
| Mortality                                                                                                                                                                                              | -1           | -1           | NA             | 0            | 0           | NA                | Low           |
| Hospitalisation                                                                                                                                                                                        | -1           | -1           | NA             | 0            | 0           | NA                | Low           |
| <i>ACEI/ARB (Vidan et al. 2016)</i>                                                                                                                                                                    |              |              |                |              |             |                   |               |
| Mortality                                                                                                                                                                                              | -1           | -1           | NA             | 0            | 0           | NA                | Very Low      |
| <i>Digoxin (Ekerstad et al. 2017)</i>                                                                                                                                                                  |              |              |                |              |             |                   |               |
| Falls                                                                                                                                                                                                  | -1           | -1           | NA             | -1           | -1          | NA                | Very Low      |
| Tiredness                                                                                                                                                                                              | -1           | -1           | NA             | -1           | -1          | NA                | Very Low      |
| Nausea                                                                                                                                                                                                 | -1           | -1           | NA             | -1           | -1          | NA                | Very Low      |
| Hospital readmission                                                                                                                                                                                   | -1           | -1           | NA             | -1           | -1          | NA                | Very Low      |
| No data was available to assess the following clinical outcomes                                                                                                                                        |              |              |                |              |             |                   |               |
| Fractures due to falls, worsening renal function, dyspnea, dizziness, syncope, hyper/hypo-kalaemia, cognitive function, oedema, infections, gynecomastia, quality of life, glucose levels, arrhythmias | NA           | NA           | NA             | NA           | NA          | NA                | NA            |

\*NA – not applicable since no meta-analysis and subgroup analysis were performed and downgraded by one level.

**Table S5 Subgroup of included participants from a secondary analysis of two randomised controlled trials. (Dewan et al. 2020)<sup>25</sup>**

|                                                                                         | PARADIGM-HF <sup>26</sup>                                                     | ATMOSPHERE <sup>27</sup>                                                       | Dewan -Frailty analysis of PARADIGM-HF and ATMOSPHERE                      | Dewan- Frailty Subgroup >75 (n, %)                                                                    |
|-----------------------------------------------------------------------------------------|-------------------------------------------------------------------------------|--------------------------------------------------------------------------------|----------------------------------------------------------------------------|-------------------------------------------------------------------------------------------------------|
| Total population (n)                                                                    | 8399                                                                          | 7016                                                                           | 15415                                                                      | 2544                                                                                                  |
| Intervention                                                                            | sacubitril/valsartan (ARNI) (n=4187)                                          | aliskiren + enalapril (n=2340)<br>aliskiren (n=2340)                           | Sub-analysis of frailty                                                    | Subgroup analysis by age                                                                              |
| Comparator                                                                              | enalapril (n=4212)                                                            | enalapril (n=2336)                                                             | Non frail<br>FI <0.210<br>Frail Subgroups:<br>FI 0.211–0.310;<br>FI >0.311 | Non frail<br>FI <0.210 (n=474)<br>Frail Subgroups:<br>FI 0.211–0.310;<br>(n=795)<br>FI >0.311 (n=829) |
| Frailty                                                                                 | No                                                                            | No                                                                             | Yes-frailty data available for<br>n=13265/15415                            | Yes-frailty data available for<br>n=2098/2544                                                         |
| Run-in phase prior to randomization (median, IQR days)                                  | 2-part single blind enalapril (15, 14-21)<br>sacubitril/valsartan (29, 26-35) | 2-part single blind enalapril (28, 16-39)<br>enalapril + aliskiren (18, 14-24) | NA                                                                         | NA                                                                                                    |
| Proportion (n,%) of patients with reported adverse events and discontinued run-in phase | enalapril<br>591/1102, 5.6%<br>sacubitril/valsartan<br>547/977, 5.8%          | enalapril<br>370/1047, 3.5%<br>aliskiren + enalapril<br>428/724, 5.9%          | NA                                                                         | NA                                                                                                    |

Note: The authors calculated frailty from cumulative deficits in a 42-item frailty index (FI) in participants in the PARADIGM-HF and ATMOSPHERE trials. Excluded from analysis were patients with  $\geq 20\%$  missing variables. Participants with  $FI < 0.210$  were considered non-frail/robust, and patients with  $FI > 0.210$  were considered frail, and further divided into groups by increments of 0.100 (0.211-0.310 or  $> 0.311$ ).<sup>25</sup>

NA: Not provided by authors
